# Supplementary material for: A simple method for the preparation of hollow ZnO nanospheres for use as a high performance photocatalyst
Source: Royal Society of Chemistry journal article supplement (doi:10.1039/c2nr12010k), 2012-01-01

## Supplementary Information:

This file contains Supplementary Figures S1 to S2 with legends.

### Figures S1

**Figure S1** SEM image of commercial ZnO.

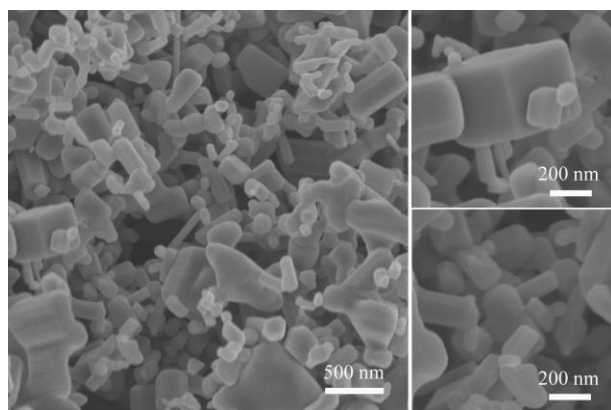

### Figure S2

**Figure S2** SEM image of hollow ZnO nano-spheres after annealing 500 °C. Some hollow nanospheres get together.

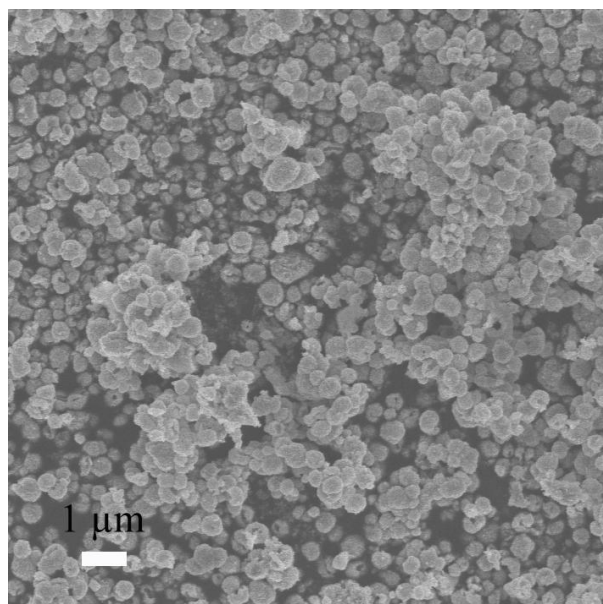

Supplement: c2nr12010k.pdf [file c2nr12010k.pdf]
